# Supplementary material for: Synthesis of 5-acyl-6-[2-hydroxy-3-(amino)propylamino]-1,3-dialkyl-1H-pyrimidine-2,4-diones
Source: Royal Society of Chemistry journal article supplement (doi:10.1039/b509775d), 2005-01-01

$^1\text{H}$  NMR spectrum of **12**

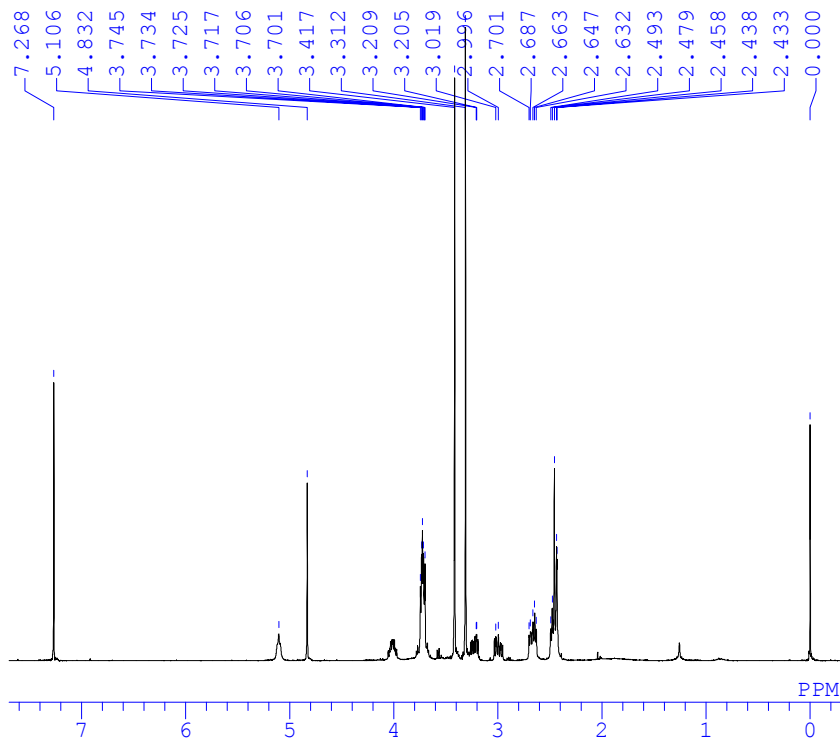

Expanded  $^1\text{H}$  NMR spectrum of **12**

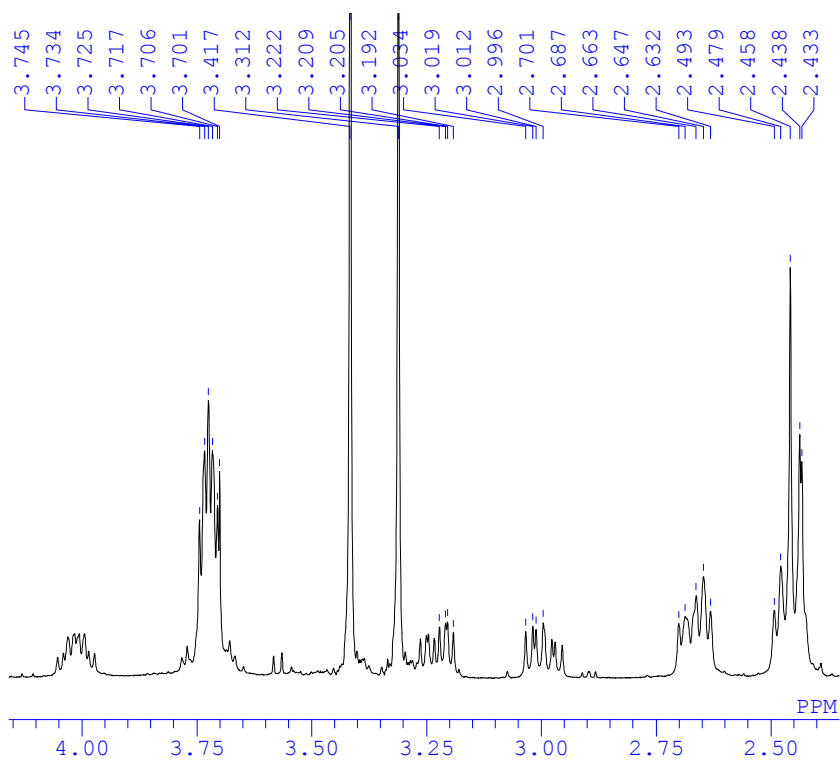

$^1\text{H}$  NMR spectrum of **12** (with  $\text{D}_2\text{O}$  exchange)

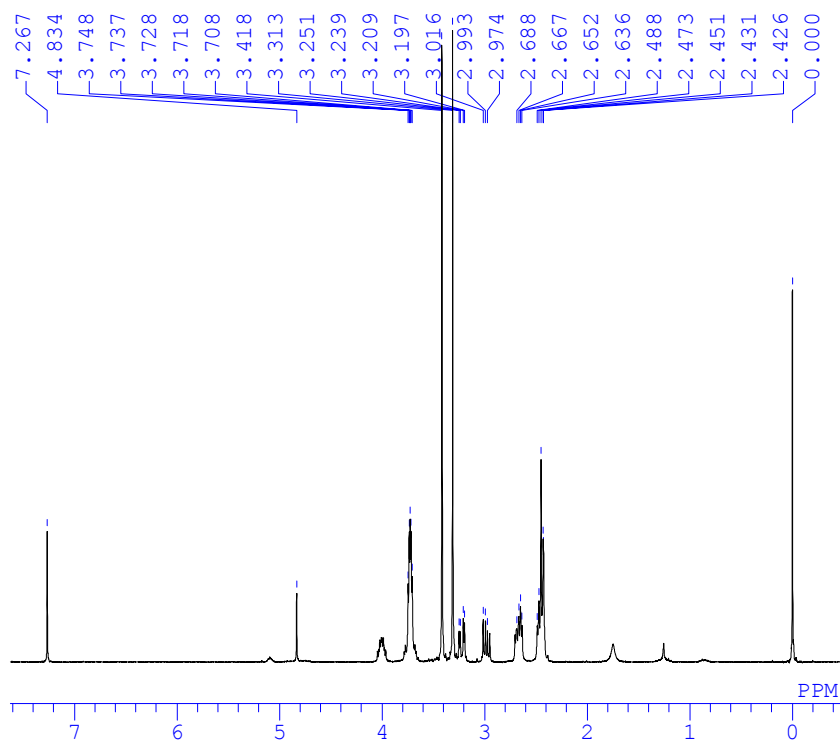

Expanded  $^1\text{H}$  NMR spectrum of **12** (with  $\text{D}_2\text{O}$  exchange)

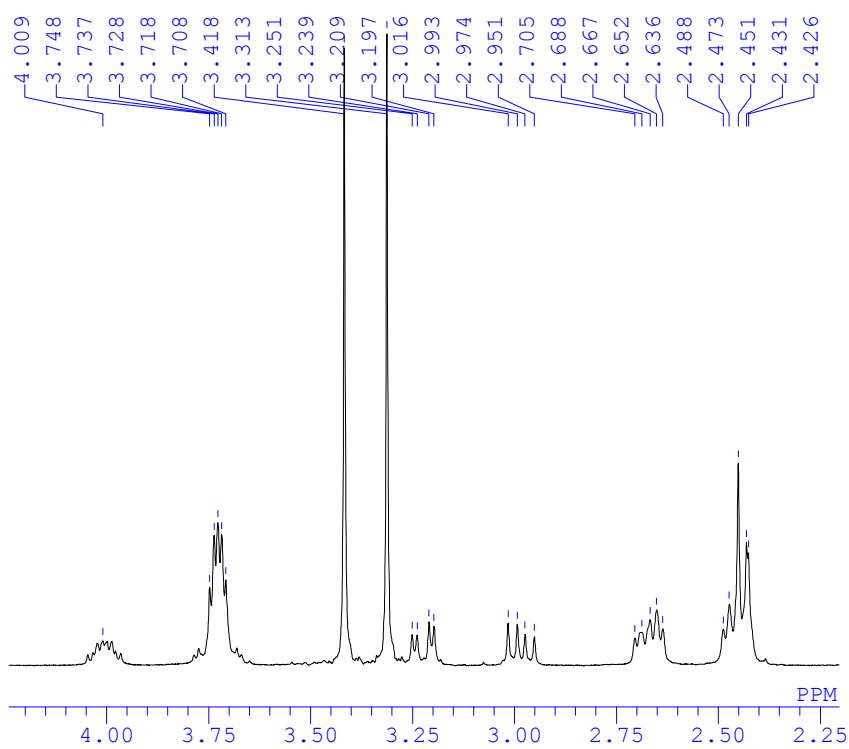

$^1\text{H}$  NMR spectrum of **18**

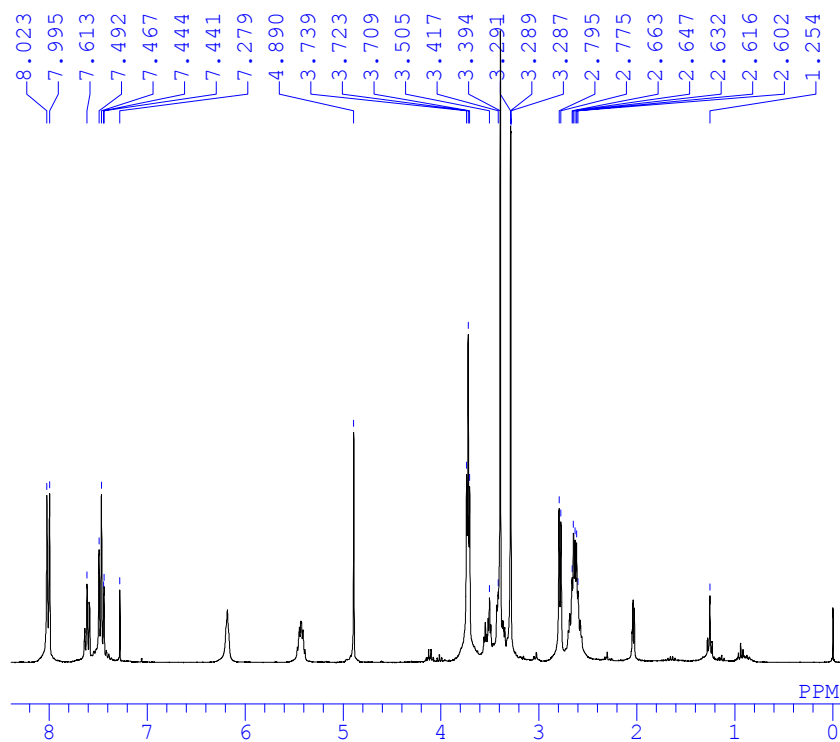

Expanded  $^1\text{H}$  NMR spectrum of **18**

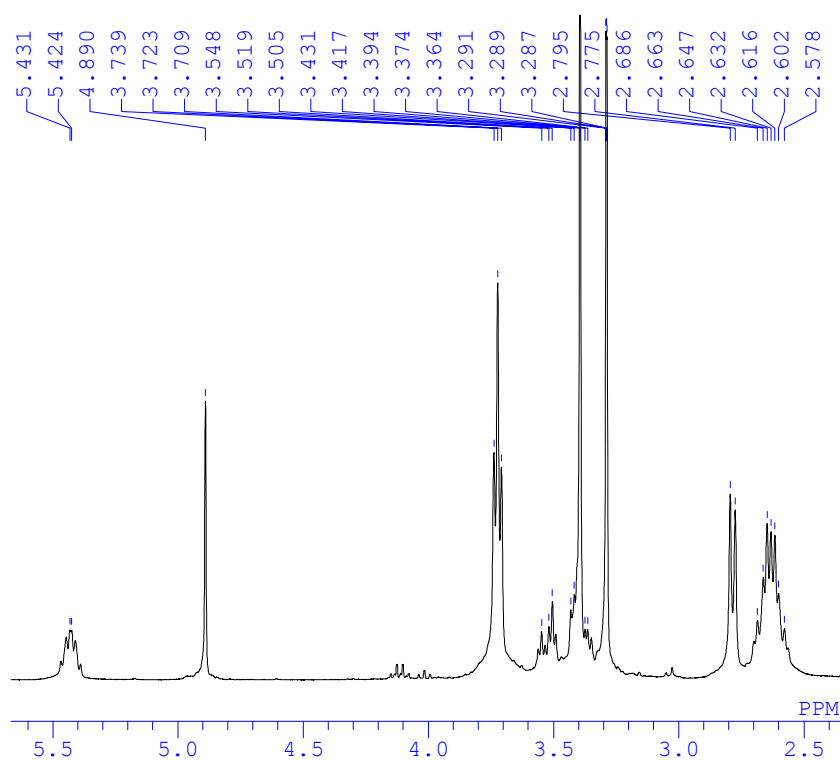

$^1\text{H}$  NMR spectrum of **18** (with  $\text{D}_2\text{O}$  exchange)

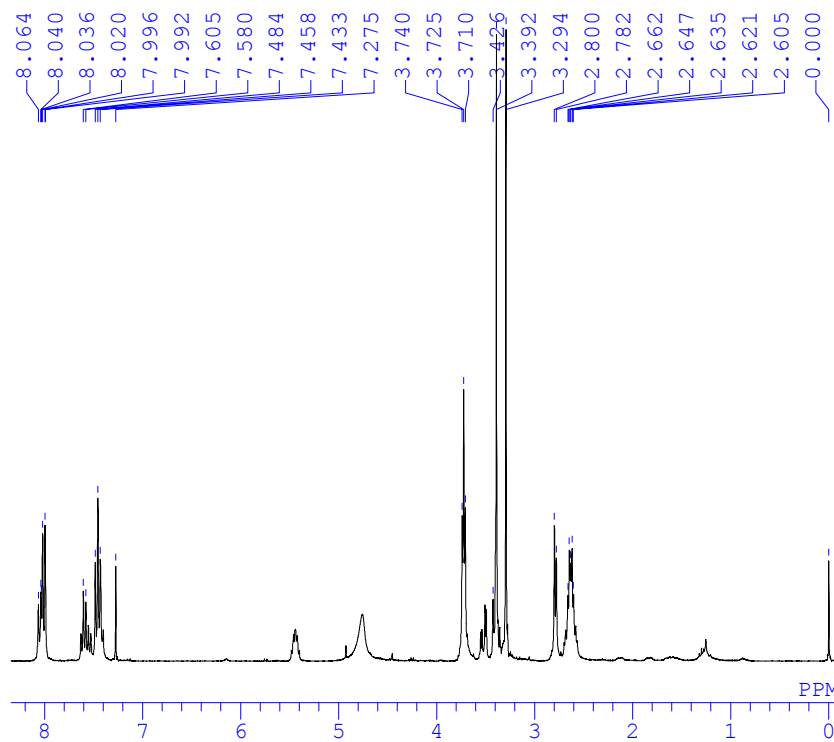

Expanded  $^1\text{H}$  NMR spectrum of **18** (with  $\text{D}_2\text{O}$  exchange)

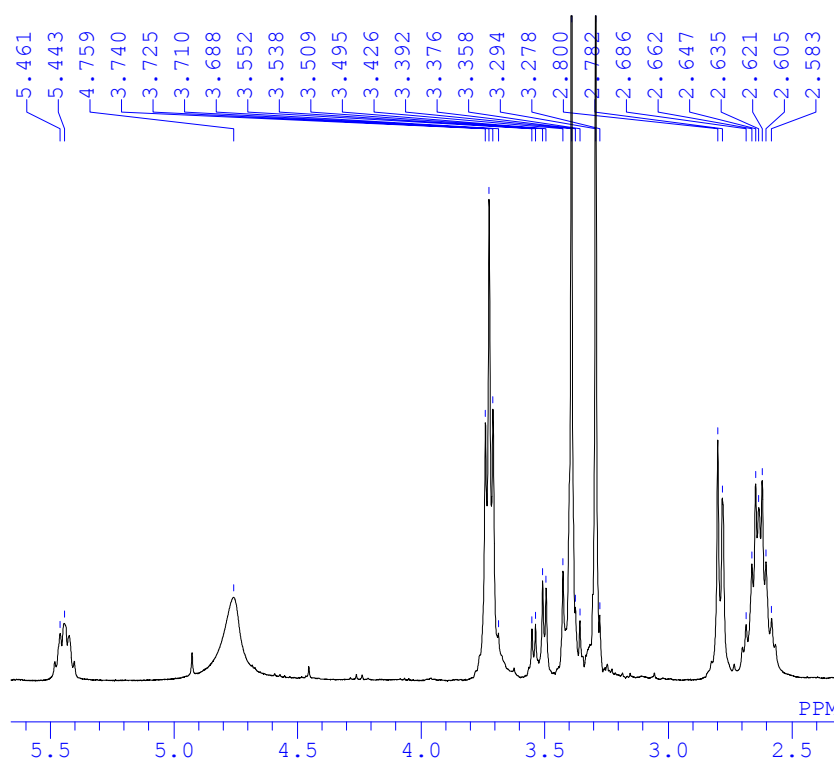

Supplement: b509775d.pdf [file b509775d.pdf]
